# Supplementary material
Source: PubMed Central journal article supplement (PMC4879086)
Supplement: NIHMS775119-supplement-Supplemental_Digital_Content.pdf [file NIHMS775119-supplement-Supplemental_Digital_Content.pdf]

## Appendix 1. Coding of Procedures, Treatments, and Complications Analyzed

|                                                       | CPT                                                                                                                                                                                                                                                                                                                                                                                      | ICD9                                                                                                                                                                                                                                                   |
|-------------------------------------------------------|------------------------------------------------------------------------------------------------------------------------------------------------------------------------------------------------------------------------------------------------------------------------------------------------------------------------------------------------------------------------------------------|--------------------------------------------------------------------------------------------------------------------------------------------------------------------------------------------------------------------------------------------------------|
| <b>Procedures</b>                                     |                                                                                                                                                                                                                                                                                                                                                                                          |                                                                                                                                                                                                                                                        |
| Oophorectomy and/or hysterectomy and/or cytoreduction | 49203, 49204, 49205, 58150, 58152, 58180, 58200, 58210, 58240, 58260, 58262, 58263, 58267, 58270, 58275, 58280, 58285, 58290, 58291, 58292, 58293, 58294, 56303, 56307, 56308, 58541, 58542, 58543, 58544, 58548, 58550, 58552, 58553, 58554, 58570, 58571, 58572, 58573, 58661, 58720, 58920, 58925, 58940, 58943, 58950, 58951, 58952, 58953, 58954, 58956, 58957, 58958, 58960, 58594 | 65.22, 65.24, 65.25, 65.29, 65.3, 65.31, 65.39, 65.4, 65.41, 65.49, 65.5, 65.51, 65.52, 65.53, 65.6, 65.61, 65.62, 65.63, 65.64, 68.3, 68.31, 68.39, 68.4, 68.41, 68.49, 68.5, 68.51, 68.59, 68.6, 68.61, 68.69, 68.7, 68.71, 68.79, 68.8, 68.9, 70.32 |
| <b>Chemotherapy</b>                                   |                                                                                                                                                                                                                                                                                                                                                                                          |                                                                                                                                                                                                                                                        |
| Intraperitoneal chemotherapy                          | 96445, 96446                                                                                                                                                                                                                                                                                                                                                                             | 54.97                                                                                                                                                                                                                                                  |
| <b>Toxicity</b>                                       |                                                                                                                                                                                                                                                                                                                                                                                          |                                                                                                                                                                                                                                                        |
| <i>Electrolyte disorders</i>                          |                                                                                                                                                                                                                                                                                                                                                                                          |                                                                                                                                                                                                                                                        |
| Hyponatremia                                          |                                                                                                                                                                                                                                                                                                                                                                                          | 276.1                                                                                                                                                                                                                                                  |
| Hypokalemia                                           |                                                                                                                                                                                                                                                                                                                                                                                          | 276.8                                                                                                                                                                                                                                                  |
| Electrolyte disorder NOS                              |                                                                                                                                                                                                                                                                                                                                                                                          | 276.9                                                                                                                                                                                                                                                  |
| Infusion of electrolytes                              |                                                                                                                                                                                                                                                                                                                                                                                          | 99.18                                                                                                                                                                                                                                                  |
| Dehydration/hypovolemia                               |                                                                                                                                                                                                                                                                                                                                                                                          | 276.5, 276.50, 276.51, 276.52                                                                                                                                                                                                                          |
| Hypomagnesemia                                        |                                                                                                                                                                                                                                                                                                                                                                                          | 275.2                                                                                                                                                                                                                                                  |
| <i>Constitutional Symptoms</i>                        |                                                                                                                                                                                                                                                                                                                                                                                          |                                                                                                                                                                                                                                                        |
| Malaise/fatigue/failure to thrive                     |                                                                                                                                                                                                                                                                                                                                                                                          | 780.79, 783.41,                                                                                                                                                                                                                                        |
| Syncope                                               |                                                                                                                                                                                                                                                                                                                                                                                          | 780.2                                                                                                                                                                                                                                                  |
| Dizziness                                             |                                                                                                                                                                                                                                                                                                                                                                                          | 780.4                                                                                                                                                                                                                                                  |
| Dysequilibrium                                        |                                                                                                                                                                                                                                                                                                                                                                                          |                                                                                                                                                                                                                                                        |
| Adverse effects of systemic treatment                 |                                                                                                                                                                                                                                                                                                                                                                                          | E933.1                                                                                                                                                                                                                                                 |
| Complications of treatment                            |                                                                                                                                                                                                                                                                                                                                                                                          |                                                                                                                                                                                                                                                        |

Wright JD, Hou JY, Burke WM, Tergas AI, Chen L, Hu JC, et al. Utilization and toxicity of alternative delivery methods of adjuvant chemotherapy for ovarian cancer. *Obstet Gynecol* 2016;127.

The authors provided this information as a supplement to their article.

Copyright © 2016 American College of Obstetricians and Gynecologists.

---

|                                                   |                                                                            |
|---------------------------------------------------|----------------------------------------------------------------------------|
| Signs or symptoms with or without chief complaint |                                                                            |
| <i>Gastrointestinal Disorders</i>                 |                                                                            |
| Nausea and emesis                                 | 787, 787.0, 787.01, 787.02, 787.03, 536.2, 578.0                           |
| Diarrhea                                          | 009.2, 009.3, 564.5, 787.91                                                |
| Constipation                                      | 564.0, 564.00, 564.01, 564.02, 564.09                                      |
| Gastroenteritis/enteritis                         | 009.0, 009.1, 558, 558.2, 558.9                                            |
| <i>Malnutrition</i>                               |                                                                            |
| Failure to thrive                                 | 783.7                                                                      |
| Abnormal weight loss/underweight                  | 783.2, 783.21, 783.22                                                      |
| Cachexia/Anorexia                                 | 799.4, 783.0                                                               |
| Malnutrition                                      | 263, 263.0, 263.1, 263.8, 263.9                                            |
| Parenteral nutrition/TPN/PPN                      | 99.15                                                                      |
| Nutritional/metabolic disorder                    |                                                                            |
| <i>Anemia and Red Cell Transfusion</i>            |                                                                            |
| Iron Deficiency anemia                            | 280, 280.0, 280.1, 280.8, 280.9                                            |
| Other deficiency anemia                           | 281, 281.0, 281.1, 281.2, 281.3, 281.4, 281.8, 281.9                       |
| Aplastic anemia                                   | 284, 284.1 284.2, 284.8, 284.81, 284.89,                                   |
| Other and unspecified anemia                      | 285, 285.0, 285.1, 285.2, 285.21, 285.22, 285.29, 285.8, 285.9             |
| Transfusion Anemia                                | V58.2, 99.03, 99.04                                                        |
| <i>Neutropenia</i>                                |                                                                            |
| Neutropenia and white blood cell disorders        | 288.0 288.00, 288.03, 288.09, 288.8 288.9                                  |
| <i>Thrombocytopenia</i>                           |                                                                            |
| Thrombocytopenia                                  | 287.4, 287.5                                                               |
| Platelet transfusion                              | 99.05                                                                      |
| <i>Venous Thromboembolism</i>                     |                                                                            |
| DVT                                               | 453.4, 453.40, 453.41, 453.42, 453.89, 453.9, 453.8                        |
| PE                                                | 415.1, 415.11, 415.12, 415.13 415.19, v12.51                               |
| Thrombophlebitis-deep veins                       | 451.1, 451.11, 451.19, 451.2, 451.8, 451.81, 451.83, 451.84, 451.89, 451.9 |

---

*Infection*

Wright JD, Hou JY, Burke WM, Tergas AI, Chen L, Hu JC, et al. Utilization and toxicity of alternative delivery methods of adjuvant chemotherapy for ovarian cancer. *Obstet Gynecol* 2016;127.

The authors provided this information as a supplement to their article.

Copyright © 2016 American College of Obstetricians and Gynecologists.

---

|                                           |                                                              |
|-------------------------------------------|--------------------------------------------------------------|
| Bacteremia/sepsis                         | 0.38.x, 790.7                                                |
| Pneumonia                                 | 480.x, 481.x, 482.x, 483.x, 485,<br>486, 478. 997.31         |
| Shock                                     | 785.50, 785.51, 785.59, 458.0,<br>458.9, 958.4               |
| Abscess                                   | 566, 567.22, 567.31, 567.38,<br>569.5, 682.9, 998.59         |
| Urinary tract<br>infection/pyelonephritis | 590.x, 590.8x, 590.9, 595.0,<br>595.4, 595.889, 595.9, 599.0 |
| Bronchitis                                | 490                                                          |
| Influenza                                 | 487, 487.0, 487.1, 487.8                                     |
| Cellulitis                                | 681.x, 682.x                                                 |
| Empyema                                   | 510, 510.0, 510.9                                            |
| Lung abscess                              | 513, 513.0, 513.1                                            |
| Fever                                     | 780.6                                                        |

---

Wright JD, Hou JY, Burke WM, Tergas AI, Chen L, Hu JC, et al. Utilization and toxicity of alternative delivery methods of adjuvant chemotherapy for ovarian cancer. *Obstet Gynecol* 2016;127.

The authors provided this information as a supplement to their article.

Copyright © 2016 American College of Obstetricians and Gynecologists.

## Appendix 2. Number of Infusions of Intraperitoneally Administered Chemotherapy

| Intraperitoneal infusions | N   | (%)    |
|---------------------------|-----|--------|
| 1                         | 111 | (12.9) |
| 2                         | 76  | (8.9)  |
| 3                         | 57  | (6.6)  |
| 4                         | 82  | (9.6)  |
| 5                         | 85  | (9.9)  |
| 6                         | 94  | (10.9) |
| 7                         | 37  | (4.3)  |
| 8                         | 47  | (5.5)  |
| 9                         | 39  | (4.5)  |
| 10                        | 67  | (7.8)  |
| 11                        | 55  | (6.4)  |
| 12                        | 100 | (11.6) |
| 13                        | 5   | (0.6)  |
| 14                        | 2   | (0.2)  |
| 15                        | 1   | (0.1)  |
| 16                        | 1   | (0.1)  |

Each infusion represents a single drug administration; for commonly used IP regimens, 1 cycle of IP chemotherapy includes 2 infusions of intraperitoneal chemotherapy (1 each of cisplatin and paclitaxel).

### Appendix 3. Distribution of Individual Complications Stratified by Type of Chemotherapy Received

|                                                   | Standard |        | Intraperitoneal |        | Dose Dense |        | <i>P</i> -value |
|---------------------------------------------------|----------|--------|-----------------|--------|------------|--------|-----------------|
|                                                   | N        | %      | N               | %      | N          | %      |                 |
| <i>Individual complications</i>                   |          |        |                 |        |            |        |                 |
| <i>Electrolyte disorders</i>                      | 478      | (11.6) | 195             | (22.7) | 116        | (12.9) | <0.001          |
| Hyponatremia                                      | 104      | (2.5)  | 36              | (4.2)  | 26         | (2.9)  | 0.03            |
| Hypokalemia                                       | 189      | (4.6)  | 101             | (11.8) | 52         | (5.8)  | <0.001          |
| Electrolyte disorder NOS                          | 16       | (0.4)  | 9               | (1.1)  | 6          | (0.7)  | 0.04            |
| Infusion of electrolytes                          | 10       | (0.2)  | 7               | (0.8)  | 1          | (0.1)  | 0.01            |
| Dehydration/hypovolemia                           | 293      | (7.1)  | 119             | (13.9) | 67         | (7.5)  | <0.001          |
| Hypomagnesemia                                    | 75       | (1.8)  | 59              | (6.9)  | 30         | (3.3)  | <0.001          |
| <i>Constitutional symptoms</i>                    | 349      | (8.4)  | 100             | (11.6) | 79         | (8.8)  | 0.01            |
| Malaise/fatigue/failure to thrive                 | 155      | (3.8)  | 41              | (4.8)  | 40         | (4.5)  | 0.29            |
| Syncope                                           | 115      | (2.8)  | 45              | (5.2)  | 23         | (2.6)  | <0.001          |
| Dizziness                                         | 72       | (1.7)  | 17              | (2.0)  | 13         | (1.5)  | 0.69            |
| Dysequilibrium                                    | 3        | (0.1)  | 0               | (0.0)  | 0          | (0.0)  | 0.53            |
| Adverse effects of systemic treatment             | 29       | (0.7)  | 11              | (1.3)  | 8          | (0.9)  | 0.22            |
| Complications of treatment                        | 32       | (0.8)  | 7               | (0.8)  | 6          | (0.7)  | 0.93            |
| Signs or symptoms with or without chief complaint | 13       | (0.3)  | 4               | (0.5)  | 2          | (0.2)  | 0.66            |
| <i>Gastrointestinal disorders</i>                 | 548      | (13.3) | 212             | (24.7) | 123        | (13.7) | <0.001          |
| Nausea & emesis                                   | 381      | (9.2)  | 160             | (18.6) | 82         | (9.1)  | <0.001          |
| Diarrhea                                          | 135      | (3.3)  | 51              | (5.9)  | 23         | (2.6)  | <0.001          |
| Constipation                                      | 152      | (3.7)  | 50              | (5.8)  | 35         | (3.9)  | 0.01            |
| Gastroenteritis/enteritis                         | 53       | (1.3)  | 9               | (1.1)  | 14         | (1.6)  | 0.63            |
| <i>Malnutrition</i>                               | 180      | (4.4)  | 56              | (6.5)  | 53         | (5.9)  | 0.01            |
| Failure to thrive                                 | 16       | (0.4)  | 3               | (0.4)  | 4          | (0.5)  | 0.95            |

Wright JD, Hou JY, Burke WM, Tergas AI, Chen L, Hu JC, et al. Utilization and toxicity of alternative delivery methods of adjuvant chemotherapy for ovarian cancer. *Obstet Gynecol* 2016;127.

The authors provided this information as a supplement to their article.

Copyright © 2016 American College of Obstetricians and Gynecologists.

|                                          |     |        |     |        |     |        |        |
|------------------------------------------|-----|--------|-----|--------|-----|--------|--------|
| Abnormal weight loss/underweight         | 11  | (0.3)  | 2   | (0.2)  | 1   | (0.1)  | 0.69   |
| Cachexia/Anorexia                        | 25  | (0.6)  | 6   | (0.7)  | 6   | (0.7)  | 0.94   |
| Malnutrition                             | 67  | (1.6)  | 15  | (1.8)  | 27  | (3.0)  | 0.02   |
| Parenteral nutrition/TPN/PPN             | 52  | (1.3)  | 8   | (0.9)  | 18  | (2.0)  | 0.11   |
| Nutritional/metabolic disorder           | 61  | (1.5)  | 30  | (3.5)  | 13  | (1.5)  | <0.001 |
| <i>Anemia &amp; red cell transfusion</i> | 448 | (10.8) | 133 | (15.5) | 126 | (14.0) | <0.001 |
| Iron Deficiency anemia                   | 33  | (0.8)  | 8   | (0.9)  | 8   | (0.9)  | 0.91   |
| Other deficiency anemia                  | 11  | (0.3)  | 2   | (0.2)  | 4   | (0.5)  | 0.63   |
| Aplastic anemia                          | 41  | (1.0)  | 5   | (0.6)  | 5   | (0.6)  | 0.28   |
| Other & unspecified anemia               | 336 | (8.1)  | 97  | (11.3) | 96  | (10.7) | 0.002  |
| Transfusion                              | 199 | (4.8)  | 65  | (7.6)  | 58  | (6.5)  | 0.002  |
| <i>Neutropenia</i>                       | 205 | (5.0)  | 67  | (7.8)  | 43  | (4.8)  | 0.002  |
| <i>Thrombocytopenia</i>                  | 82  | (2.0)  | 18  | (2.1)  | 16  | (1.8)  | 0.89   |
| Thrombocytopenia                         | 75  | (1.8)  | 15  | (1.8)  | 15  | (1.7)  | 0.95   |
| Platelet transfusion                     | 18  | (0.4)  | 3   | (0.4)  | 5   | (0.6)  | 0.80   |
| <i>Venous thromboembolism</i>            | 208 | (5.0)  | 72  | (8.4)  | 51  | (5.7)  | <0.001 |
| Deep vein thrombosis                     | 108 | (2.6)  | 31  | (3.6)  | 29  | (3.2)  | 0.21   |
| Pulmonary embolism                       | 131 | (3.2)  | 50  | (5.8)  | 30  | (3.3)  | <0.001 |
| Thrombophlebitis-deep veins              | 24  | (0.6)  | 9   | (1.1)  | 5   | (0.6)  | 0.28   |
| <i>Infection</i>                         | 636 | (15.4) | 162 | (18.9) | 138 | (15.4) | 0.04   |
| Bacteremia/sepsis                        | 132 | (3.2)  | 36  | (4.2)  | 30  | (3.3)  | 0.34   |
| Pneumonia                                | 93  | (2.3)  | 20  | (2.3)  | 25  | (2.8)  | 0.63   |
| Shock                                    | 84  | (2.0)  | 24  | (2.8)  | 19  | (2.1)  | 0.37   |
| Abscess                                  | 231 | (5.6)  | 46  | (5.4)  | 40  | (4.5)  | 0.39   |
| Urinary tract infection/pyelonephritis   | 254 | (6.1)  | 65  | (7.6)  | 57  | (6.4)  | 0.30   |
| Bronchitis                               | 11  | (0.3)  | 3   | (0.4)  | 3   | (0.3)  | 0.88   |

Wright JD, Hou JY, Burke WM, Tergas AI, Chen L, Hu JC, et al. Utilization and toxicity of alternative delivery methods of adjuvant chemotherapy for ovarian cancer. *Obstet Gynecol* 2016;127.

The authors provided this information as a supplement to their article.

Copyright © 2016 American College of Obstetricians and Gynecologists.

|              |     |       |    |       |    |       |      |
|--------------|-----|-------|----|-------|----|-------|------|
| Influenza    | 7   | (0.2) | 1  | (0.1) | 1  | (0.1) | 0.88 |
| Cellulitis   | 159 | (3.9) | 35 | (4.1) | 24 | (2.7) | 0.20 |
| Empyema      | 4   | (0.1) | 1  | (0.1) | 1  | (0.1) | 0.98 |
| Lung abscess | 1   | (0.0) | 0  | (0.0) | 0  | (0.0) | 0.81 |
| Fever        | 12  | (0.3) | 2  | (0.2) | 4  | (0.5) | 0.68 |

Outcomes were compared using  $\chi^2$  tests.
